# Supplementary material for: Smoking status impacts microRNA mediated prognosis and lung adenocarcinoma biology
Source: PubMed Central journal article supplement (PMC4216369; doi:10.1186/1471-2407-14-778), 2014-10-24
Supplement: 12885_2014_4957_MOESM15_ESM.pdf [file 12885_2014_4957_MOESM15_ESM.pdf]

## Additional File 15

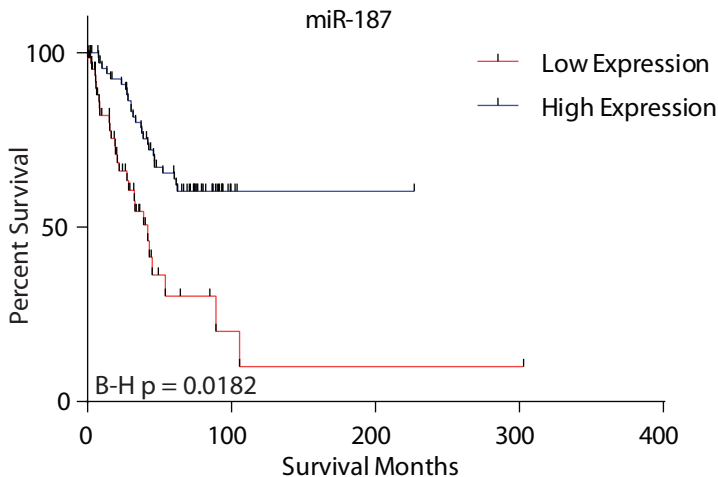

**Additional File 15.** miR-187 is the most significant miRNA associated with patient survival. Associations between miRNA expression and LUAC patient survival were assessed using a logrank, Mantel-Haenszel test. Considering all patient samples combined, regardless of smoking histories, miR-187 was the disrupted miRNA most significantly associated with patient survival after multiple testing correction.
